# Supplementary material
Source: MDPI journal article supplement (https://www.mdpi.com/search?q=molbank-2021-M1267)
Supplement: s002 [file molbank-2021-M1267-s002.mol]

Compound 2.mol
  ChemDraw08052110102D

 21 23  0  0  0  0  0  0  0  0999 V2000
   -2.4084   -0.0000    0.0000 C   0  0  0  0  0  0  0  0  0  0  0  0
   -2.4084   -0.8250    0.0000 C   0  0  0  0  0  0  0  0  0  0  0  0
   -1.6940   -1.2375    0.0000 N   0  0  0  0  0  0  0  0  0  0  0  0
   -0.9795   -0.8250    0.0000 C   0  0  0  0  0  0  0  0  0  0  0  0
   -0.9795   -0.0000    0.0000 C   0  0  0  0  0  0  0  0  0  0  0  0
   -1.6940    0.4125    0.0000 N   0  0  0  0  0  0  0  0  0  0  0  0
   -0.2650    0.4125    0.0000 C   0  0  0  0  0  0  0  0  0  0  0  0
    0.4495   -0.0000    0.0000 P   0  0  0  0  0  0  0  0  0  0  0  0
   -0.2650   -1.2375    0.0000 C   0  0  0  0  0  0  0  0  0  0  0  0
    1.0328    0.5834    0.0000 C   0  0  0  0  0  0  0  0  0  0  0  0
    1.8270    0.3706    0.0000 C   0  0  0  0  0  0  0  0  0  0  0  0
    2.4084    0.9520    0.0000 C   0  0  0  0  0  0  0  0  0  0  0  0
    2.1956    1.7462    0.0000 C   0  0  0  0  0  0  0  0  0  0  0  0
    1.4014    1.9590    0.0000 C   0  0  0  0  0  0  0  0  0  0  0  0
    0.8200    1.3776    0.0000 C   0  0  0  0  0  0  0  0  0  0  0  0
    1.0328   -0.5834    0.0000 C   0  0  0  0  0  0  0  0  0  0  0  0
    0.8200   -1.3776    0.0000 C   0  0  0  0  0  0  0  0  0  0  0  0
    1.4014   -1.9590    0.0000 C   0  0  0  0  0  0  0  0  0  0  0  0
    2.1956   -1.7462    0.0000 C   0  0  0  0  0  0  0  0  0  0  0  0
    2.4084   -0.9520    0.0000 C   0  0  0  0  0  0  0  0  0  0  0  0
    1.8270   -0.3706    0.0000 C   0  0  0  0  0  0  0  0  0  0  0  0
  4  9  1  0      
 14 15  2  0      
 13 14  1  0      
 12 13  2  0      
 11 12  1  0      
 10 11  2  0      
 10 15  1  0      
  8 10  1  0      
 20 21  2  0      
 19 20  1  0      
 18 19  2  0      
 17 18  1  0      
 16 17  2  0      
 16 21  1  0      
  8 16  1  0      
  1  2  2  0      
  2  3  1  0      
  3  4  2  0      
  4  5  1  0      
  5  6  2  0      
  6  1  1  0      
  5  7  1  0      
  7  8  1  0      
M  STY  1   1 SUP
M  SLB  1   1   1
M  SAL   1  1   9
M  SBL   1  1   1
M  SMT   1 Me
M  SBV   1   1   -0.7145    0.4125
M  STY  1   2 SUP
M  SLB  1   2   2
M  SAL   2  6  10  11  12  13  14  15
M  SBL   2  1   8
M  SMT   2 Ph
M  SBV   2   8   -0.5834   -0.5834
M  STY  1   3 SUP
M  SLB  1   3   3
M  SAL   3  6  16  17  18  19  20  21
M  SBL   3  1  15
M  SMT   3 Ph
M  SBV   3  15   -0.5834    0.5834
M  END
