# Supplementary material
Source: MDPI journal article supplement (https://www.mdpi.com/search?q=molbank-2021-M1267)
Supplement: s003 [file molbank-2021-M1267-s003-mod.mol]

Compound 3.mol
  corina  08052111373D 1   1.00000     0.00000 
CORINA 4.3.0 0026  30.10.2019
 22 24  0  0  0  0  0  0  0  0999 V2000
   -0.0158    1.3173    0.0093 C   0  0  0  0  0  0  0  0  0  0  0  0
    1.1727    2.0253    0.0017 C   0  0  0  0  0  0  0  0  0  0  0  0
    2.3260    1.3803   -0.0127 N   0  0  0  0  0  0  0  0  0  0  0  0
    2.3440    0.0592   -0.0200 C   0  0  0  0  0  0  0  0  0  0  0  0
    1.1551   -0.6490   -0.0124 C   0  0  0  0  0  0  0  0  0  0  0  0
    0.0021   -0.0041    0.0020 N   0  0  0  0  0  0  0  0  0  0  0  0
    1.1756   -2.1559   -0.0212 C   0  0  0  0  0  0  0  0  0  0  0  0
    1.1678   -2.7537   -1.7434 P   0  0  0  0  0  0  0  0  0  0  0  0
    2.4857   -1.6875   -2.8299 Se  0  0  0  0  0  0  0  0  0  0  0  0
    3.6592   -0.6764   -0.0359 C   0  0  0  0  0  0  0  0  0  0  0  0
    1.6341   -4.5064   -1.7772 C   0  0  0  0  0  0  0  0  0  0  0  0
    1.6975   -5.1816   -2.9817 C   0  0  0  0  0  0  0  0  0  0  0  0
    2.0532   -6.5172   -3.0075 C   0  0  0  0  0  0  0  0  0  0  0  0
    2.3455   -7.1775   -1.8287 C   0  0  0  0  0  0  0  0  0  0  0  0
    2.2821   -6.5022   -0.6242 C   0  0  0  0  0  0  0  0  0  0  0  0
    1.9314   -5.1653   -0.5989 C   0  0  0  0  0  0  0  0  0  0  0  0
   -0.4936   -2.5563   -2.4444 C   0  0  0  0  0  0  0  0  0  0  0  0
   -0.7444   -2.9436   -3.7475 C   0  0  0  0  0  0  0  0  0  0  0  0
   -2.0106   -2.7936   -4.2816 C   0  0  0  0  0  0  0  0  0  0  0  0
   -3.0259   -2.2564   -3.5126 C   0  0  0  0  0  0  0  0  0  0  0  0
   -2.7751   -1.8691   -2.2095 C   0  0  0  0  0  0  0  0  0  0  0  0
   -1.5102   -2.0240   -1.6737 C   0  0  0  0  0  0  0  0  0  0  0  0
  4 10  1  0      
 15 16  2  0      
 14 15  1  0      
 13 14  2  0      
 12 13  1  0      
 11 12  2  0      
 11 16  1  0      
  8 11  1  0      
 21 22  2  0      
 20 21  1  0      
 19 20  2  0      
 18 19  1  0      
 17 18  2  0      
 17 22  1  0      
  8 17  1  0      
  1  2  2  0      
  2  3  1  0      
  3  4  2  0      
  4  5  1  0      
  5  6  2  0      
  6  1  1  0      
  5  7  1  0      
  7  8  1  0      
  8  9  2  0      
M  STY  1   1 SUP
M  SLB  1   1   1
M  SAL   1  1  10
M  SBL   1  1   1
M  SMT   1 Me
M  SBV   1   1   -0.7145    0.4125
M  STY  1   2 SUP
M  SLB  1   2   2
M  SAL   2  6  11  12  13  14  15  16
M  SBL   2  1   8
M  SMT   2 Ph
M  SBV   2   8   -0.4125    0.7145
M  STY  1   3 SUP
M  SLB  1   3   3
M  SAL   3  6  17  18  19  20  21  22
M  SBL   3  1  15
M  SMT   3 Ph
M  SBV   3  15   -0.8250    0.0000
M  END
$$$$
