# Supplementary material
Source: MDPI journal article supplement (https://www.mdpi.com/search?q=molbank-2021-M1267)
Supplement: s003 [file molbank-2021-M1267-s003.inchi]

InChI=1S/C18H17N2PSe/c1-15-18(20-13-12-19-15)14-21(22,16-8-4-2-5-9-16)17-10-6-3-7-11-17/h2-13H,14H2,1H3
AuxInfo=1/0/N:10,14,20,13,15,19,21,12,16,18,22,2,1,7,4,11,17,5,3,6,8,9/E:(2,3)(4,5,6,7)(8,9,10,11)(16,17)/rA:22CCNCCNCPSeCCCCCCCCCCCCC/rB:d1;s2;d3;s4;s1d5;s5;s7;d8;s4;s8;d11;s12;d13;s14;s11d15;s8;d17;s18;d19;s20;s17d21;/rC:-4.9887,1.2565,0;-4.9887,-.2886,0;-3.6506,-1.0612,0;-2.3124,-.2886,0;-2.3124,1.2565,0;-3.6506,2.0291,0;-.9744,2.0291,0;.3637,1.2565,0;.7636,2.7488,0;-.9744,-1.0612,0;1.1363,-.0817,0;.3663,-1.4153,0;1.1363,-2.7488,0;2.6761,-2.7488,0;3.4463,-1.4153,0;2.6761,-.0817,0;1.9088,1.2565,0;2.6788,-.0772,0;4.2188,-.0772,0;4.9887,1.2565,0;4.2188,2.59,0;2.6788,2.59,0;
