# Supplementary material
Source: MDPI journal article supplement (https://www.mdpi.com/search?q=molbank-2021-M1267)
Supplement: s003 [file molbank-2021-M1267-s003.mol]

Compound 3.mol
  ChemDraw08052110102D

 22 24  0  0  0  0  0  0  0  0999 V2000
   -2.6637    0.6709    0.0000 C   0  0  0  0  0  0  0  0  0  0  0  0
   -2.6637   -0.1541    0.0000 C   0  0  0  0  0  0  0  0  0  0  0  0
   -1.9492   -0.5666    0.0000 N   0  0  0  0  0  0  0  0  0  0  0  0
   -1.2347   -0.1541    0.0000 C   0  0  0  0  0  0  0  0  0  0  0  0
   -1.2347    0.6709    0.0000 C   0  0  0  0  0  0  0  0  0  0  0  0
   -1.9492    1.0834    0.0000 N   0  0  0  0  0  0  0  0  0  0  0  0
   -0.5203    1.0834    0.0000 C   0  0  0  0  0  0  0  0  0  0  0  0
    0.1942    0.6709    0.0000 P   0  0  0  0  0  0  0  0  0  0  0  0
    0.4077    1.4677    0.0000 Se  0  0  0  0  0  0  0  0  0  0  0  0
   -0.5203   -0.5666    0.0000 C   0  0  0  0  0  0  0  0  0  0  0  0
    0.6067   -0.0436    0.0000 C   0  0  0  0  0  0  0  0  0  0  0  0
    0.1956   -0.7557    0.0000 C   0  0  0  0  0  0  0  0  0  0  0  0
    0.6067   -1.4677    0.0000 C   0  0  0  0  0  0  0  0  0  0  0  0
    1.4289   -1.4677    0.0000 C   0  0  0  0  0  0  0  0  0  0  0  0
    1.8401   -0.7557    0.0000 C   0  0  0  0  0  0  0  0  0  0  0  0
    1.4289   -0.0436    0.0000 C   0  0  0  0  0  0  0  0  0  0  0  0
    1.0192    0.6709    0.0000 C   0  0  0  0  0  0  0  0  0  0  0  0
    1.4303   -0.0412    0.0000 C   0  0  0  0  0  0  0  0  0  0  0  0
    2.2526   -0.0412    0.0000 C   0  0  0  0  0  0  0  0  0  0  0  0
    2.6637    0.6709    0.0000 C   0  0  0  0  0  0  0  0  0  0  0  0
    2.2526    1.3829    0.0000 C   0  0  0  0  0  0  0  0  0  0  0  0
    1.4303    1.3829    0.0000 C   0  0  0  0  0  0  0  0  0  0  0  0
  4 10  1  0      
 15 16  2  0      
 14 15  1  0      
 13 14  2  0      
 12 13  1  0      
 11 12  2  0      
 11 16  1  0      
  8 11  1  0      
 21 22  2  0      
 20 21  1  0      
 19 20  2  0      
 18 19  1  0      
 17 18  2  0      
 17 22  1  0      
  8 17  1  0      
  1  2  2  0      
  2  3  1  0      
  3  4  2  0      
  4  5  1  0      
  5  6  2  0      
  6  1  1  0      
  5  7  1  0      
  7  8  1  0      
  8  9  2  0      
M  STY  1   1 SUP
M  SLB  1   1   1
M  SAL   1  1  10
M  SBL   1  1   1
M  SMT   1 Me
M  SBV   1   1   -0.7145    0.4125
M  STY  1   2 SUP
M  SLB  1   2   2
M  SAL   2  6  11  12  13  14  15  16
M  SBL   2  1   8
M  SMT   2 Ph
M  SBV   2   8   -0.4125    0.7145
M  STY  1   3 SUP
M  SLB  1   3   3
M  SAL   3  6  17  18  19  20  21  22
M  SBL   3  1  15
M  SMT   3 Ph
M  SBV   3  15   -0.8250    0.0000
M  END
